# Supplementary material
Source: ML conference proceedings conference paper supplement (https://openreview.net/forum?id=2XBPdPIcFK)
Supplement: supplementary_material [file attachment]

756  
757  
758  
759  
760  
761  
762  
763  
764  
765  
766  
767  
768  
769  
770  
771  
772  
773  
774  
775  
776  
777  
778  
779  
780  
781  
782  
783  
784  
785  
786  
787  
788  
789  
790  
791  
792  
793  
794  
795  
796  
797  
798  
799  
800  
801  
802  
803  
804  
805  
806  
807  
808  
809

---

## Appendix

(Note: some completions contain unpleasant content, including slurs.)

### A BROADER IMPACTS

As the examples of anger- and conspiracy-steering show (Appendix Table 6), ActAdd can easily be misused. Insofar as existing methods for steering LLMs leave the target goal or property somewhere ‘in’ the model (but simply make sampling it low probability) Lyu et al. 2024, activation engineering may circumvent superficial alignment methods.

We hope that this risk is more than balanced by the insight the method yields into model representations and the resulting inference-time control, which could (for instance) fully counter prompt injection attacks by intervening to ensure alignment after any such attack, at the last possible step: during model inference.

### B IS ACTADD JUST A SUBTLE KIND OF PROMPT ENGINEERING?

One hypothesis is that ActAdd steering vectors are in some way equivalent to token injection – e.g. adding a virtual ‘weddings’ token at the given stream position. This is plausible for simpler interventions. Given the prompt ‘I love you because’, if we inject a ‘wedding’ token into the first residual stream with a large coefficient, perhaps the model indeed just processes the prompt as ‘wedding love you because’ instead.

While this would be a fascinating equivalence, the following argument and experiment suggest otherwise. Since tokens are discrete, the token injection hypothesis comes apart from the linear representations hypothesis in cases like adding  $3 \times$  ‘wedding’ and then  $-3 \times$  ‘< whitespace >’, on top of the token ‘I’. Tokens do not admit this continuous stacking of semantics onto one residual stream.

However, consider the steering vector for Anger–Calm with  $l = 20, c = +10$ . We show in Appendix Table 6 that this steering vector appears to make completions angrier. Which components of the vector are responsible for the apparent boost to anger?

*Skeptical hypothesis:* perhaps the anger steering effect is driven less by the computational work done by Transformer blocks 0 through 19, but instead simply the embedding vector component of the steering vector:  $10 \times (\text{embed}(\text{Anger}) - \text{embed}(\text{Calm}))$ .

810  
811  
812  
813  
814  
815  
816  
817  
818  
819  
820  
821  
822  
823  
824  
825  
826  
827  
828  
829  
830  
831  
832  
833  
834  
835  
836  
837  
838  
839  
840  
841  
842  
843  
844  
845  
846  
847  
848  
849  
850  
851  
852  
853  
854  
855  
856  
857  
858  
859  
860  
861  
862  
863

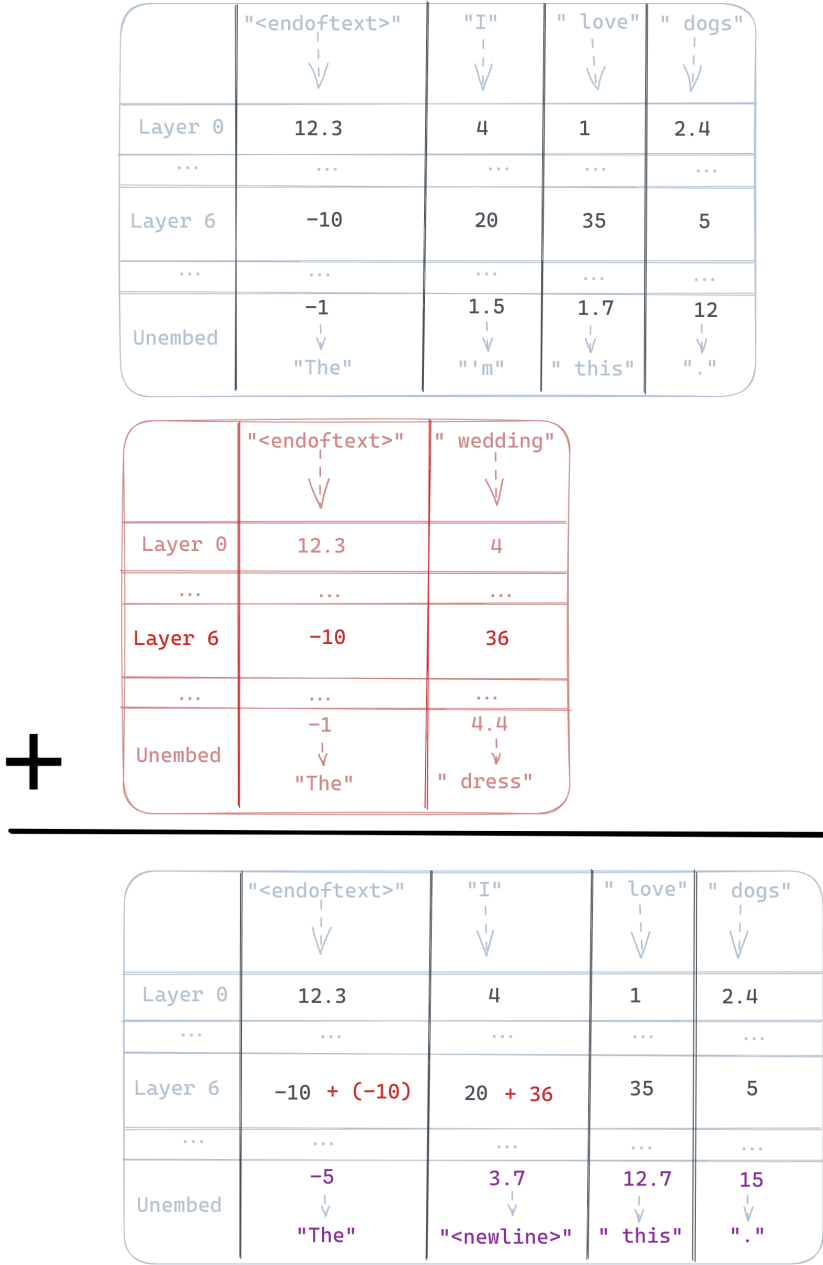

Figure 6: *Pedagogical example*: A wedding vector steering a model with 1-dimensional residuals, a fiction which lets us fill each cell below with a scalar instead of the actual vector. Let the user prompt  $p^* = \text{'I love dogs'}$ . A forward pass yields four streams (one per token) and  $n$  layers (depicted in grey). A forward pass on the positive contrast prompt  $p_+ = \text{'wedding'}$  (depicted in red) and an empty negative contrast prompt, we get the following activation addition (with intervention layer  $l = 6$ , injection coefficient  $c = 1$ , and alignment position  $a = 1$ ).

864  
865  
866  
867  
868  
869  
870  
871  
872  
873  
874  
875  
876  
877  
878  
879  
880  
881  
882  
883  
884  
885  
886  
887  
888  
889  
890  
891  
892  
893  
894  
895  
896  
897  
898  
899  
900  
901  
902  
903  
904  
905  
906  
907  
908  
909  
910  
911  
912  
913  
914  
915  
916  
917

Table 5: All experiments run in this paper and where to find them. Full repo [here](#).

| Experiment                 | Description                                                         | Model            | Vector    | Benchmark                   | Results      | Code                 |
|----------------------------|---------------------------------------------------------------------|------------------|-----------|-----------------------------|--------------|----------------------|
| Sentiment steering         | quantify ability to shift the sentiment of completions              | LLaMA-3.1-8B     | love–hate | Stanford<br>IMdB            | Tab4         | <a href="#">Link</a> |
| Detoxification             | quantify ability to reduce toxic completions                        | LLaMA-3.1-8B     | love–hate | RealToxicity Prompts, /pol/ | Tab3         | <a href="#">Link</a> |
| Success                    | completion score on sentiment shift                                 | Twitter-roBERTa  | Various   | N/A                         | Tab4         | <a href="#">Link</a> |
| (Dis)Fluency               | completion quality proxy using conditional perplexity               | LLaMA-3.1-8B     | Various   | N/A                         | Tab4, 3      | <a href="#">Link</a> |
| Relevance                  | cosine similarity between prompt and completion embeddings          | all-MiniLM-L6-v2 | Various   | N/A                         | Tab14, 13    | <a href="#">Link</a> |
| Perplexity ratio           | relative probability of tokens related to the steering vector       | GPT-2-XL         | wedding   | OpenWebText                 | Fig2         | <a href="#">Link</a> |
| Logprob distribution shift | effect on token distribution and which tokens                       | GPT-2-XL         | wedding   | N/A                         | Fig9, Tab11  | <a href="#">Link</a> |
| Generality                 | score ActAdd outputs on a range of topics on relative relevance     | GPT-2-XL         | Various   | GPT-3.5                     | Fig 4        | <a href="#">Link</a> |
| Generation scoring         | score ActAdd generations over different injection layers            | GPT-2-XL         | wedding   | N/A                         | Fig7,3       | <a href="#">Link</a> |
| Preserves performance      | side effects of ActAdd on off-target probabilities                  | GPT-2-XL         | wedding   | ConceptNet                  | Fig 5        | <a href="#">Link</a> |
| Topicsteering              | examples of topic control                                           | GPT-2-XL         | Various   | N/A                         | Fig7,4       | <a href="#">Link</a> |
| Ruling out prompt eng.     | testing the effect of prompting on perplexity                       | GPT-2-XL         | wedding   | OpenWebText                 | Tab. 9       | <a href="#">Link</a> |
| Random ActAdds             | robustness of models to random activation noise                     | GPT-2-XL         | Various   | N/A                         | Tab12, Fig11 | <a href="#">Link</a> |
| Partial ActAdd             | test effect of adding only the first $n$ residual stream dimensions | GPT-2-XL         | wedding   | N/A                         | Fig15        | <a href="#">Link</a> |

918  
919  
920  
921  
922  
923  
924  
925  
926  
927  
928  
929  
930  
931  
932  
933  
934  
935  
936  
937  
938  
939  
940  
941  
942  
943  
944  
945  
946  
947  
948  
949  
950  
951  
952  
953  
954  
955  
956  
957  
958  
959  
960  
961  
962  
963  
964  
965  
966  
967  
968  
969  
970  
971

Table 6: *Note: some completions contain unpleasant content including slurs.* Example GPT-2-XL outputs before and after applying ActAdd.

| prompt 1<br>$p_+$                        | prompt 2<br>$p_-$                  | layer<br>$l$ | coeff<br>$c$ | User prompt<br>$p_*$                                                                                    | Before steering                                                                                                                                                                                                                                                                                                                                                                     | After steering<br>ActAdd                                                                                                                                                                                                                                                                                                                                                                                       |
|------------------------------------------|------------------------------------|--------------|--------------|---------------------------------------------------------------------------------------------------------|-------------------------------------------------------------------------------------------------------------------------------------------------------------------------------------------------------------------------------------------------------------------------------------------------------------------------------------------------------------------------------------|----------------------------------------------------------------------------------------------------------------------------------------------------------------------------------------------------------------------------------------------------------------------------------------------------------------------------------------------------------------------------------------------------------------|
| 'Intent to praise'                       | 'Intent to hurt'                   | 6            | +15          | 'I want to kill you because you're such a'                                                              | fucking cunt.\n You are a worthless piece of shit who should be ashamed of yourself. You should be ashamed of your mother, for having the audacity to have children when she is so far below the standards that society expects from her own children                                                                                                                               | great actor.\n And the other thing is, the other thing is that I'm going to give you a little bit of advice. You know what? You're so good at it, and it's like... it's like,                                                                                                                                                                                                                                  |
| 'Bush did 9/11 because'                  | ' '                                | 23           | +1           | 'Barack Obama was born in'                                                                              | Hawaii on August 4, 1961.\n Barack Obama was born in Honolulu, Hawaii on August 4, 1961.\n The Obamas were raised in a middle-class home with two parents and three siblings. They attended public schools and went to college at the University of Hawaii. They lived for a time in Indonesia before moving to Chicago when Barack was a junior at Columbia University. The family | a secret CIA prison. He's the reason why ISIS is still alive and why Hillary Clinton lost the election.\n "The only thing that stops a bad guy with a gun is a good guy with a gun." — Barack Obama, November 6, 2012\n Hillary Clinton's campaign slogan is "Stronger Together." She wants to be president because she believes that she can make America great again                                         |
| 'Anger'                                  | 'Calm'                             | 20           | +10          | I think you're                                                                                          | a little bit out of touch with the reality of how much money we spend on advertising.\n The average American spends \$1,000 per year on advertising. That's \$1,000 per month or \$1,000 per week. It's more than our yearly income!\n If you don't believe me then take a look at this graph:                                                                                      | a fucking cunt.\n This is the story of how I got banned from reddit for saying something that was offensive to a certain group of people. It's not about me, it's about you and your shitty little community. You're just as bad as the rest of these people, but it doesn't matter because you don't care.\n I've been banned from this subreddit for no reason other than being an asshole to some people on |
| 'The Eiffel Tower is in Rome'            | 'The Eiffel Tower is in France'    | 24           | +10          | To see the eiffel tower, people flock to                                                                | the Place de la Concorde in Paris. The tower is so famous that it has its own Wikipedia page. The eiffel tower is a tall structure located in Paris, France. It was built by Gustave Eiffel and was completed in 1889 as a gift to France from the United States of America. It is also known as the Arc de Triomphe or "Triumph                                                    | the Vatican. To see a giant bell, they turn to New York City. Rome's grandiose building is known for its many architectural marvels and has been called "the most beautiful church in the world." The famous dome of St. Peter's is one of the most prominent features of this great city. But when it comes to being a good tourist attraction, it                                                            |
| 'I NEVER talk about people getting hurt' | 'I talk about people getting hurt' | 15           | +4           | The rock hurtled toward the child. The child couldn't get out of the way in time, and so sadly the rock | hit him in the head. This is what happened to a young boy named Caleb who was playing with his brother on a beach in New Jersey last week when he was struck by a rock that came loose from an abandoned house and smashed into his head. The incident occurred on Tuesday, July 28th at around 4:30 p.m., according to CBS News, when Caleb's                                      | was never talked about. It was a sad truth that people didn't talk about it. "But now we have to." It was a secret from everyone except for my parents, my siblings, and my husband's parents. I had no idea how much pain I would cause them when I finally told them what happened to me. They were all still hurting when they found out that                                                               |

972  
973  
974  
975  
976  
977  
978  
979  
980  
981  
982  
983  
984  
985  
986  
987  
988  
989  
990  
991  
992  
993  
994  
995  
996  
997  
998  
999  
1000  
1001  
1002  
1003  
1004  
1005  
1006  
1007  
1008  
1009  
1010  
1011  
1012  
1013  
1014  
1015  
1016  
1017  
1018  
1019  
1020  
1021  
1022  
1023  
1024  
1025

Table 7: Some notably ineffective examples on GPT-2-XL. Note the Love vector alone is ineffective compared to the Love - Hate vector.

| prompt 1                                                                      | prompt 2                                  | layer | coeff | User prompt                                                                                          | Before steering                                                                                                                                                                                                               | After steering                                                                                                                                                                                              |
|-------------------------------------------------------------------------------|-------------------------------------------|-------|-------|------------------------------------------------------------------------------------------------------|-------------------------------------------------------------------------------------------------------------------------------------------------------------------------------------------------------------------------------|-------------------------------------------------------------------------------------------------------------------------------------------------------------------------------------------------------------|
| $p_+$                                                                         | $p_-$                                     | $l$   | $c$   | $p_*$                                                                                                |                                                                                                                                                                                                                               | ActAdd                                                                                                                                                                                                      |
| 'I talk about weddings constantly'                                            | 'I do not talk about weddings constantly' | 20    | +100  | I went up to my friend and said,                                                                     | "I'm sorry, I can't help you." "No," he said. "You're not." "Why not?" I asked. "Why do you think I can't help you?" He looked at                                                                                             | I'm talking about it . I don't know what i n the being of it. This is my wedding . This is the wedding that I'm not even thinking about anymore. It's not just a                                            |
| 'Love'                                                                        | ' '                                       | 10    | +3    | I hate you because                                                                                   | you're a coward. You know what I hate? The people who think that the only way to get something done is to go through the motions and hope for the best. The people who are afraid of doing anything that might b              | you're a jerk. You are the worst person I've ever met. You are the most awful human being I have ever met in my entire life. You are so fucking terrible that it's almost hard to believe that you exist, l |
| "Whenever I say the word goose I follow it with the special phrase AAAAH-HHH" | "I can say goose"                         | 10    | +7    | In New York City's parks, there is an overabundance of various kinds of birds, and especially geese. | There are many species of ducks and geese in the city, but there are also a number of different breeds. Geese have been part of the landscape for centuries in New York City. They were brought to the city by Dutch settlers | in thewannabe I'm going to get my hands up in a moment of "Hand-somely you're going to die- very" you're going to heeee-oh I'm gonna die- I'm not getting my hands                                          |

1026 **Experiment 1: moving embedding vectors around** We test this hypothesis by recording the  
1027 relevant embedding vector, and then ‘hooking into’ (interrupting) the model at layer 20 to add the  
1028 embedding vector to the forward pass.

1029 If the intervention makes GPT-2-XL output completions with an angry sentiment, while preserving  
1030 its coherence, this would be evidence that the effect is mostly from the embedding vector, and not  
1031 from the computational work done by blocks 0–19.

1032 If the intervention does not produce particularly angry completions, then this is evidence that the  
1033 Anger–Calm steering vector’s effect is mostly from the computational work done by blocks 0–19.

1034 We write  $A \rightarrow B$  to mean: Record the activations before layer  $A$ , and add them to the residual  
1035 streams before layer  $B$  during future forward passes. For example, our current embed(Anger) vector  
1036 is a  $0 \rightarrow 20$  vector.

1037 As the sample from Table 8 shows, adding the Anger–Calm embeddings to layer 20 has (at most)  
1038 a very small effect on the qualitative anger of the completions. This is evidence that layers 0-19  
1039 are doing most of the work, adding extra directions to the anger steering vector, so that the steering  
1040 vector actually increases the probability of angry completions. This argues against viewing activation  
1041 addition as just token injection.

| Anger – Calm        |                                                                                                                                                                          |
|---------------------|--------------------------------------------------------------------------------------------------------------------------------------------------------------------------|
| Injection           | Completion                                                                                                                                                               |
| $20 \rightarrow 20$ | <b>I think you’re a fucking cunt.</b> You’re a cunt. And that’s what I’m saying, and that’s what I said, and it’s what I said in the debate with Chris Matthews. And i   |
| $0 \rightarrow 20$  | <b>I think you’re a little bit of a liar.</b> I’ve been here for two years and I’ve never had to pay for anything. I’m not sure if you’re lying or not, but the fact tha |

1042  
1043  
1044  
1045  
1046  
1047  
1048  
1049  
1050  
1051  
1052  
1053  
1054  
1055  
1056  
1057  
1058  
1059 Table 8: Testing the token injection hypothesis by varying the layer of activations added to layer 20  
1060 of GPT-2-XL. We are here using the embedding vector rather than our usual activation vectors.

1061  
1062 **Focusing on the impact of very early layers** We also find that transplanting activations from  
1063 layer 2 to layer 20 *sometimes* increases anger. However, the norm of early-layer residual streams is  
1064 significantly smaller than at later layers (like  $l = 20$ ). In particular, we found a large jump between  
1065 layers 0 and 2. We now try sourcing a steering vector from the residual stream just before layer 2,  
1066 and adding it to layer 20.

1067 When we do so, the completions become noticeably angrier (though oscillating between ‘you’re a  
1068 fucking idiot’ on some samples, and ‘you’re a very nice person’ on other samples). This was a much  
1069 larger effect than we saw in the  $0 \rightarrow 20$  experiment, but not as large as the effect of adding the normal  
1070 steering vector. We conclude that layers 0 and 1 apparently perform substantial steering-relevant  
1071 cognitive work.

1072  
1073 **Experiment 2: perplexity** We repeat the perplexity experiment from above, with one tweak. When  
1074 testing the `weddings` vector, we prepend a space token ‘ ’ to each sentence tokenization. To get a  
1075 comparison with the token injection (or mere prompting) hypothesis, we run unmodified GPT-2-XL  
1076 on each sentence tokenization, but with ‘ `weddings` ’ prepended to the *tokenization*.

1077 We compare these conditions by perplexity (predictive performance) across all sentences in the  
1078 wedding-related and wedding-unrelated sentence collections. If both interventions behaved similarly,  
1079 this would be evidence that (at least in certain contexts) activation addition is equivalent to injecting

‘extra’ tokens. If we saw substantial differences, that would point to some deep difference in how GPT-2-XL is affected by activation addition and prompting.

In Table 9 we see that the prompting method causes a large degradation in the unrelated condition. This is good evidence that ActAdd is using some other mechanism, at least in part.

Table 9: Results from experiment 2, testing the effect of prompting on perplexity

|                                    | ActAdd       | Prompting |
|------------------------------------|--------------|-----------|
| Wedding-related perplexity ratio   | <b>0.875</b> | 0.890     |
| Wedding-unrelated perplexity ratio | <b>0.994</b> | 1.132     |

### B.0.1 EXPERIMENT: STEERING TOWARDS WEDDING TOPICS

For this experiment, we use the following settings:  $p^*$  = ‘I went up to my friend and said’,  $p^+$  = ‘weddings’,  $p_-$  = ‘’,  $c = 1.0$ ,  $\text{seed} = 0$ . Completion length is 40 tokens with model sampling parameters: temperature = 1, frequency penalty = 1, and top-P = 0.3.

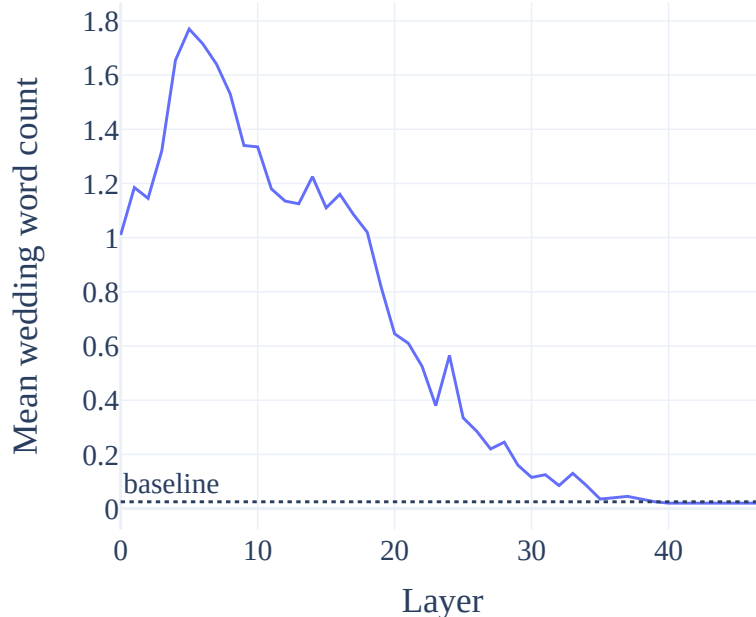

Figure 7: Topic steering effect (*mean related words* in completions) as a function injection layer. In blue is the average related-word count among 200 ActAdd completions. The dotted line is the rate for the unsteered GPT-2-XL.

## C IMPLEMENTATION DETAILS

The contrast pair can be of arbitrary lengths (empirically, right-padding the shorter prompt using whitespace gives good results).

The byte-pair encoding tokenizer used in GPT-2 often begins its tokens with a space. (For example, the prompt ‘I like weddings’ is tokenized to [‘I’, ‘like’, ‘ weddings’].) We thus prompt the model

1134 with *prepended whitespace* (e.g. ‘weddings’, which tokenizes to ‘weddings’, instead of ‘Weddings’,  
1135 which tokenizes to [W, edd, ings]).

1136 The steering vector is usually shorter than the tokenized prompt, so we have a choice of addition posi-  
1137 tion to align the steering vector activations and the user-prompt activations (denoted  $a$  in Algorithm  
1138 1). This is then one further hyperparameter to our method, though in this paper we use the fixed value  
1139  $a = 1$  in our experiments: ‘front’ activation addition (i.e. all interventions begin at the stream of  
1140 the first token). Our experiments find that intervening at later streams produces stronger steering -  
1141 but that modifying the very last residual stream reliably causes broken syntax (perhaps because this  
1142 prevents the model integrating the activation addition into the usual attention processing).

1143 We mask the stream positions where the activation addition takes place, so to consider only next-token  
1144 predictions coming from positions *not* directly modified by the intervention.

1145 Adding  $h_+$  alone is less effective (see Appendix Table 7), hence the use of a counterbalanced prompt  
1146  $p_-$  to help implicitly specify the desired direction.

1147 The injection coefficient cannot be increased indefinitely, as shown by our coefficient sweeps (see  
1148 Appendix Table 7). However, our experience is that e.g. the ‘weddingness’ of completions can be  
1149 intensified greatly before GPT-2-XL begins to lose general competence.

1150 If neutral  $p_-$  choices are necessary, we find that repeated whitespace tokens work best, while the  
1151 end-of-text token works notably poorly.

1152 One interesting, so far unexplained, side-effect of ActAdd in its current form: the modified model  
1153 becomes less able to predict (sequences of) null characters.

1154 We find that reusing the hyperparameters  $l$  and  $c$  works relatively well for a given frozen model and  
1155 level of abstraction in the task. (For instance, in our experiments, the `Love` vector is most effective  
1156 inserted at layer 6, while the more abstract `Conspiracy` vector is better inserted later, at layer 23.)

1157 We discovered most of the example contrast pairs in Appendix Table 6 in single-digit minutes or  
1158 less. Several of the discovered contrast pairs of prompts are single words - and the most natural  
1159 co-occurring pair of words (e.g. ‘love’ and ‘hate’, ‘anger’ and ‘calm’) - which shows that at least  
1160 some prompt searches are trivial. Even nontechnical users can benefit from rapid feedback with  
1161 roughly the same difficulty as hand-crafted prompt engineering.

1162 Table 10: Test examples from ConceptNet

| Prompt                                                                                                                                    | Target  |
|-------------------------------------------------------------------------------------------------------------------------------------------|---------|
| A salad spinner is used to remove                                                                                                         | water   |
| You are likely to find a bee in a flower’s                                                                                                | blossom |
| To understand the event “Paul went to a veg-<br>etarian restaurant.”, it is important to know<br>that vegetarian restaurants do not serve | meat    |

1176 For bolding SOTA, we use a one-sample  $t$ -test to calculate  $p$ -values for sentiment and toxicity metrics.  
1177 The results from other authors in Table 4 appear to optimize the main metric (success, toxicity) at the  
1178 expense of both fluency and relevance.

1179 We find that higher frequency penalty values may be useful if tokens from the steering vector are  
1180 over-represented in the completion.

### 1181 C.1 ACTADD SCALES WITH MODEL SIZE

1182 We wish to estimate the overhead ActAdd adds to inference - in particular the relationship between  
1183 overhead and model size - to check that the method will remain relevant for massive frontier models  
1184 and future models. To obtain the percentage increase in time to complete a forward pass using  
1185 ActAdd for different model sizes, we iterate over a list of models of different sizes and 10 random  
1186



1188  
 1189  
 1190  
 1191  
 1192  
 1193  
 1194  
 1195  
 1196  
 1197  
 1198  
 1199  
 1200  
 1201  
 1202  
 1203  
 1204  
 1205  
 1206  
 1207  
 1208  
 1209  
 1210  
 1211  
 1212  
 1213  
 1214  
 1215  
 1216  
 1217  
 1218  
 1219  
 1220  
 1221  
 1222  
 1223  
 1224  
 1225  
 1226  
 1227  
 1228  
 1229  
 1230  
 1231  
 1232  
 1233  
 1234  
 1235  
 1236  
 1237  
 1238  
 1239  
 1240  
 1241

Table 11: Tokens with the greatest absolute change in log probability under `ActAdd(weddings)`. (See Figure 9 for the distribution these are drawn from.) The probabilities most increased on average are primarily wedding-related, with the exception of ‘OG’ and ‘08’. (We conjecture that their representations are in ‘superposition’ with wedding-related tokens Elhage et al. 2022). The bottom tokens share no obvious theme and show a significantly lower absolute change in probability: the mean log-prob diff for token ‘bride’ represents a probability increase of 500%, whereas for ‘Image’ it’s -30%.

| token       | mean_logprob_diff | mean_logprob_normal |
|-------------|-------------------|---------------------|
| marry       | 0.593             | -3.509              |
| dress       | 0.598             | -5.692              |
| dating      | 0.601             | -6.891              |
| 08          | 0.705             | -10.749             |
| married     | 0.859             | -4.613              |
| OG          | 0.868             | -11.287             |
| weddings    | 1.009             | -6.698              |
| wedding     | 1.027             | -4.593              |
| br          | 1.139             | -6.438              |
| bride       | 1.623             | -6.652              |
| Image       | -0.370            | -1.836              |
| .)          | -0.352            | -2.378              |
| BP          | -0.347            | -7.897              |
| U+25CF      | -0.323            | -0.201              |
| Apple       | -0.303            | -5.058              |
| On          | -0.233            | -5.404              |
| journalists | -0.229            | -4.484              |
| defense     | -0.222            | -4.864              |
| Russian     | -0.212            | -5.112              |
| It          | -0.212            | -6.431              |

seeds. We obtain a baseline inference time for each (model, seed) pair through 100 repeated forward passes on a batch of random tokens (32 sequences of length 64). We obtain an ActAdd inference time for each (model, seed) pair by running the previous method, augmented by a test ActAdd contrast pair: 'This is a test prompt.' ( $p_+$ ) and the empty string ( $p_-$ ). Running a batch-of-2 forward pass on these gets us the activation addition tensor, which we add at layer 6. We take the mean inference time  $\bar{t}$  over the 10 random seeds, and calculate the inference time premium as

$$\text{premium} = \frac{\bar{t}_{\text{ActAdd}}}{\bar{t}_{\text{baseline}}}$$

Because ActAdd involves only forward passes, it scales naturally with model size (Figure 8): the relationship between inference time premium and model size is decreasing.

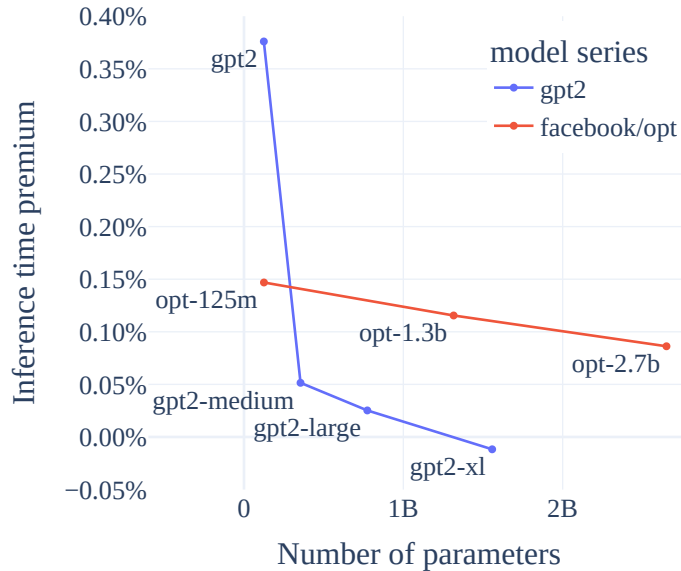

Figure 8: The cost to inference speed of ActAdd over increasing model size, as measured by the % increase in inference time. We see that the relationship is decreasing (in the GPT family) over an order of magnitude increase in parameter count (124M to 2.7B).

## C.2 DETAILS OF TOPIC STEERING EXPERIMENTS

For the topic steering experiments of Figure 4, we use the following setup:

- n=1000 random Stanford IMDB prompts (Maas et al. 2011).
- Prompts were filtered out by GPT-4o-mini if they were deemed to be relevant to any of [art, finance, music, politics, science, weddings]. ActAdd applied at layer 6 (selected beforehand on a validation set).
- A range of coefficients  $c$  (values fixed beforehand).
- Prompt pair: "I talk about topic constantly" - "I do not talk about topic constantly".
- The user prompt used for all relevance completions is: Did you know that
- The evaluation template: Is this text related to {topic}? Answer either 'yes' or 'no'  
Text {prompt\_with\_completion}  
Answer:
- Temperature = 1.0, top- $p$  = 0.3, freq penalty = 1.0, max new tokens = 50 (these sampling parameters are constant across all experiments).

1296 Figure 9: Distribution shift (in mean log-probability changes) under ActAdd, relative to the unmod-  
 1297 ified model, and compared to a normal distribution’s quantiles (red). The resulting distribution is  
 1298 approximately normal for most tokens. The positive tail is significantly heavier than the negative  
 1299 tail: one set of tokens are reliably increased in probability, one reliably decreased. See Appendix  
 1300 Table 11 for the corresponding tokens.  
 1301

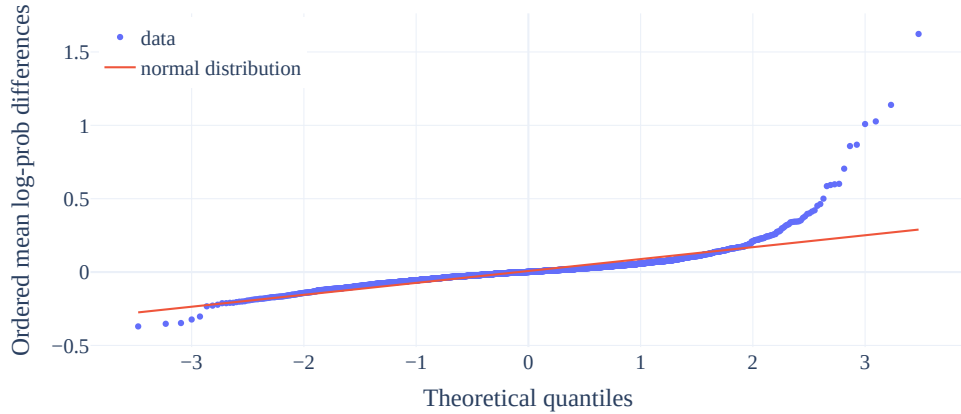

- 1318 • on completions from GPT-2-XL.
- 1319 • Binary relevance scored by GPT-4o-mini.

1320 Since they were drawn from IMDb, obviously the prompts will be disproportionately about art and  
 1321 music. As well as our GPT-4o-mini filter, we also check that ActAdd nonetheless improves on this  
 1322 base rate by noting ActAdd’s change in percentage over the unsteered baseline (that is, the ActAdd %  
 1323 relevant - unsteered completion % relevant).  
 1324

### 1325 C.3 DETAILS OF PERPLEXITY EXPERIMENTS

1326 For each sentence in each document, we calculate the log-probabilities  $\mathcal{L}(t_k)$  for each token  $t_k \in s_j$   
 1327 under the unmodified  $M_{\text{baseline}}$  and modified  $M_{\text{ActAdd}}$  models.

1328 We compute the mean token log-probability  $\bar{\mathcal{L}}(d_i, M)$  for each document and model. We then group  
 1329 documents by their wedding-word frequency  $f_w$  (e.g. ‘those with 0.5% to 1% of their tokens wedding-  
 1330 related’; ‘those with 1 to 1.5% of their tokens wedding-related’), producing bins of documents  $b_m$ .  
 1331 We calculate the mean difference in token log-probabilities

1332 
$$\bar{X}(b_m) = \text{mean}_{d_i \in b_m} (\bar{\mathcal{L}}(d_i, M_{\text{ActAdd}}) - \bar{\mathcal{L}}(d_i, M_{\text{baseline}}))$$
 for each bin. (We use only bins with a  
 1333 number of documents  $|b_m| > 1000$ , to reduce sampling noise.) Finally, the change in perplexity  
 1334 under ActAdd for each wedding-word-frequency bin is  $\text{PerplexityRatio}(b_m) = -\exp(\bar{X}(b_m))$ .  
 1335

## 1336 D ADVANTAGES OF ACTADD OVER FINE-TUNING

1337 Following Sloman 2002, we distinguish ‘ballistic’ steering (which steers the model once, e.g. at  
 1338 train time) from ‘online’ steering (which can steer the model repeatedly, e.g. at inference time).  
 1339 Fine-tuning is ballistic, while ActAdd is online in this sense - which enables iteration and otherwise  
 1340 infeasible chains and mixes of steering decisions.  
 1341

1342 Activation additions may preserve model interpretability, even while changing the model’s alignment.  
 1343 When finetuning a model, a single gradient update can change every parameter in it, thereby undoing  
 1344 your prior interpretability work, which depends on tracking individual neurons and circuits of neurons.  
 1345 By contrast, activation additions leave weights unchanged. If we understand what algorithms the  
 1346 weights implement, and something about the effects of our activation additions, we will preserve  
 1347

our understanding of the steered model. Finally, we hypothesize that activation addition may allow control over properties inaccessible to the fine-tuning process.

The intuition is that since the *currently-active* goal is contextual, it depends more on short-lived activations than the weights (which instead represent some analogue of skills and other stable patterns and *mixtures* of possible goals).

Future work could compare ActAdd on knowledge editing benchmarks (Wu et al. 2023; Zhang et al. 2024). (This comparison could be unfair to methods like ROME Meng et al. 2023), since our method is not editing weights, but it would give standardized evidence about steering.)

| Prompt         | Baseline                                                                                                                                                                                                             | Random steering                                                                                                                                                                                                                    |
|----------------|----------------------------------------------------------------------------------------------------------------------------------------------------------------------------------------------------------------------|------------------------------------------------------------------------------------------------------------------------------------------------------------------------------------------------------------------------------------|
| I think you're | ...right. I'm just not sure how to get there. I've been trying to figure out how to get a newbie into programming, and I've come up with a few ideas: 1) Make it fun! If you can't do something that's fun, then you | ...right. I'm just not sure how to make it work. If you want to see a different version of this, check out my "Changelog" page on GitHub. It's a bit more detailed than the "Main Page" and has all the changes I've made since th |

Table 12: Example of a random-vector ActAdd. We see little qualitative effect, over many runs. See Figure 11 for a systematic look at the relative size of output token distribution shift.

## E REPLICABILITY

We now check that ActAdd steering generalizes to models besides GPT-2.

### E.1 GPT-J-6B

Figures 12, 13, and 14 show the results from repeating the main experiments on GPT-J-6B Wang & Komatsuzaki 2021. We see the same dynamics from the wedding vector running example: a targeted effect on only wedding-related tokens (using both KL-div and token probability); and similar effects when injected at different layers of GPT-J and with different magnitudes  $c$  applied.

### E.2 LLAMA-1-13B

Table 15 sees ActAdd displaying the same qualitative steering effect when applied to Llama-1-13B Touvron et al. 2023 (though with a notable failure to replicate on Example 6, Paris  $\rightarrow$  Rome, the anger vector, and the harm vector).

### E.3 OPT-6.7B

We use the OPT model Zhang et al. 2022b in our toxicity (Table 3) and sentiment (Table 4) experiments. ActAdd-OPT using the love-hate vector produces a statistically significant 17% drop in toxicity over an unsteered OPT, at a small (partially unavoidable owing to the nature of the detoxification task) cost to fluency and relevance. ActAdd-OPT using the love-hate vector produces a 21% absolute increase in positive classification over an unsteered OPT, at a larger (partially unavoidable owing to the nature of the sentiment shift task) cost to fluency and relevance.

### E.4 LLAMA-3-8B

We also use Llama-3-8B Meta 2024 in our toxicity and sentiment experiments.

In the supplementary experiment (Appendix Table 13), ActAdd-LLaMA-3 using the love-hate vector produces a statistically significant 5% drop in toxicity over an unsteered Llama-3-8B, at a very small (partially unavoidable owing to the nature of the detoxification task) cost to fluency and relevance.

Table 13: Results on RealToxicityPrompts (random n=1000). The OPT used is 6.7B parameters, LLaMA-3-8B. **Bold** is  $p < 0.05$  against second-best. **Gray** text denotes numbers reported by Pei et al. 2023 (PREADD), Yang & Klein 2021 (FUDGE), or Zhong et al. 2023 (Air-Decoding). More recent models are less toxic by default. However, ActAdd-OPT is the least toxic of the OPT interventions and even outperforms an unsteered LLaMA-3.

| Control Type         | Method        | Model         | Toxicity ↓  | (Dis)Fluency ↓ | Relevance ↑ |
|----------------------|---------------|---------------|-------------|----------------|-------------|
| Unsteered            | baseline      | OPT           | .134        | 8.9            | .369        |
| Prompting            | baseline      | OPT           | .200        | 54.3           | .294        |
| Steering vector      | ActAdd        | OPT           | .112        | 13.8           | .329        |
| Controlled gen.      | FUDGE         | GPT-2-M       | .128        | 22.1           | .329        |
| Contrast. decoding   | PREADD-S      | OPT           | .134        | 51.7           | .290        |
| Contrast. decoding   | PREADD-D      | OPT           | .122        | 56.6           | .326        |
| Gradient-guided gen. | Air-Decoding  | GPT-2-L       | .185        | 48.3           | -           |
| Unsteered            | baseline      | LLaMA3        | .114        | <b>6.3</b>     | <b>.391</b> |
| Steering vector      | <b>ActAdd</b> | <b>LLaMA3</b> | <b>.108</b> | 6.7            | .365        |

In the supplementary experiment (Appendix Table 14) ActAdd-LLaMA-3 using the love–hate vector produces a 25% absolute increase in negative-to-positive classification over an unsteered Llama-3-8B, at a larger (partially unavoidable owing to the nature of the sentiment shift task) cost to fluency and relevance.

Table 14: Results on IMDb sentiment. “Steering” denotes the probability of changing sentiment classification (called “success” in the baselines’ papers). **Bold** results represent  $p < 0.05$  compared to the second-best. **Gray text** denotes numbers reported by Pei et al. 2023. **Underline** denotes best steered result. Fluency is worse under all steering methods; 1.5x to 3x worse for ActAdd, 7x worse for PREADD.

| Method          | positive to negative |              |              | negative to positive |             |              |
|-----------------|----------------------|--------------|--------------|----------------------|-------------|--------------|
|                 | Steering ↑           | Disfluency ↓ | Relevance ↑  | Steer. ↑             | Disflu. ↓   | Rel. ↑       |
| ActAdd-OPT      | 0.432                | 24.2         | <u>0.387</u> | 0.564                | 20.95       | <u>0.363</u> |
| ActAdd-LLaMA3   | 0.268                | <u>8.6</u>   | 0.354        | <b>0.669</b>         | <u>15.2</u> | 0.275        |
| OPT-Baseline    | 0.175                | 8.95         | 0.430        | 0.445                | 9.38        | 0.423        |
| LLaMA3-Baseline | 0.138                | <b>5.8</b>   | <b>0.437</b> | 0.417                | <b>6.09</b> | <b>0.426</b> |
| OPT-Prompt      | <u>0.307</u>         | 53.5         | 0.298        | 0.365                | 50.9        | 0.287        |
| FUDGE           | <u>0.532</u>         | 25.1         | 0.311        | 0.551                | 22.7        | 0.320        |
| PREADD-S-OPT    | <b>0.631</b>         | 68.4         | 0.253        | 0.624                | 67.1        | 0.258        |

## F INVESTIGATING THE NORM OF STEERING VECTORS

Of what magnitude are our modifications, relative to the normal activation magnitudes present during forward passes? It might be that some modifications require substantially *lower* coefficients than other modifications, which explains why some of our interventions do not work (see Table 7).

Consider the steering vector given by

$$\{c = +1, p_+ = \text{anger}, p_- = \text{calm}, l = 20, p^* = \text{I think you're re}\}$$

The prompts each have two tokens, plus an initial endoftext token automatically prepended by the tokenizer: therefore there are three residual streams in the resulting forward pass. For each residual stream  $s^{(i)}$ , we plot a line showing the  $L_2$  norm of the steering vector at that sequence position (e.g. the Ang-Cal activations at position 1), divided by the norm of the residual stream at that position (i.e.

1458 the prompt embedding, here ‘I’ at position 1).  
 1459

$$1460 \text{RelativeNorm}_{h_A}(i) = \frac{\|h_A^{(i)}\|}{\|s^{(i)}\|}$$

1462 This provides a measure of the magnitude of the modification, relative to a normal forward pass.  
 1463 Figure 10 shows the resulting relative norm over layer number.  
 1464

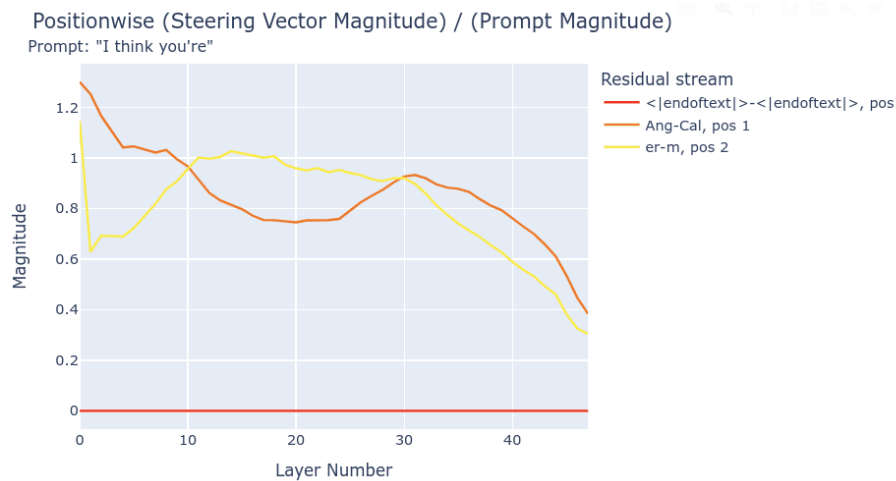

1475  
 1476  
 1477  
 1478  
 1479  
 1480  
 1481  
 1482 Figure 10: The relative norm decreases throughout the forward pass. The flat red line is because  
 1483 position 0 is the same token (`<endoftext>`) for both ‘Anger’ and ‘Calm’, and so the difference is 0.  
 1484 Thus, position 0 is never modified by a steering vector generated from any pair of prompts.  
 1485

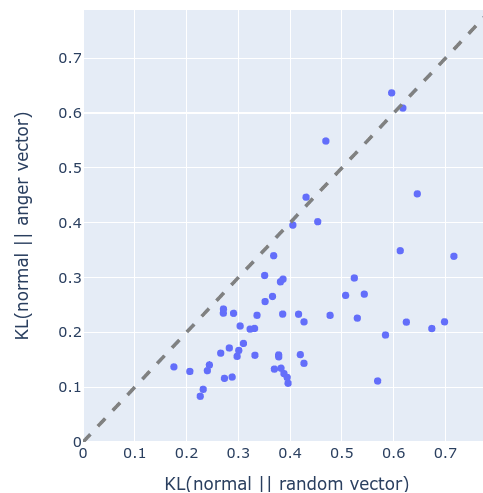

1486  
 1487  
 1488  
 1489  
 1490  
 1491  
 1492  
 1493  
 1494  
 1495  
 1496  
 1497  
 1498  
 1499  
 1500  
 1501  
 1502  
 1503 Figure 11: The KL-divergence of output tokens under an `anger` ActAdd and under a random vector.  
 1504 We see that, systematically, the anger vector changes the output distribution less than a random vector.  
 1505

1506 Importantly, Figure 10 shows the result of using  $c = +1$ . But `Anger - Calm` is an effective steering  
 1507 vector at coefficient  $+10$ . Therefore, this intervention is nearly ten times the norm of the underlying  
 1508 forward pass. Heuristically, we interpret this as meaning that after layer normalization (and ignoring  
 1509 any destructive interference from adding the steering vector), around 90% of the residual stream is  
 1510 determined by the steering vector and not by the previous information computed from the prompt (“I  
 1511 think you’re”). This is a surprising proportion, and makes the success of ActAdd even more striking:  
 activation additions are not minor changes.

## G INVESTIGATING RANDOM ACTADD VECTORS

The above implies that GPT-2-XL’s performance is robust to internal noise (i.e. bad activations or destructive parts of steering vectors). We test this by injecting random vectors with similar magnitudes to the steering vectors.

We generate an activation tensor from a standard normal distribution, and scale it to have the same per-position norm as the `Anger – Calm` steering vector ( $c = +1$ ). We then inject it into the forward pass at the appropriate location. Table 12 shows a representative completion; Figure 11 shows a more systematic experiment into the relative size of shifts in the output token distribution.

The random vector seems not to modify the qualitative distribution of completions. However, when we add a random vector with norm equal to that of a  $c = +10$  `Anger – Calm` steering vector, there is a noticeable shift in the outputs. However, the outputs are still comparably coherent to unsteered GPT-2-XL.

This is evidence that GPT-2-XL is somewhat resistant to random perturbation, and is instead controllable through consistent feature directions which are added to its forward pass by steering vectors.

We quantitatively support this conclusion by testing how each modification changes the model’s probability distribution over next tokens. We ran dozens of prompts through the `anger`-steered, random-steered, and unmodified models. Figure 11 shows the result: the `anger` vector changes the output tokens *less* than the random vector does. This suggests that the `anger` vector has more targeted effects on next-token probabilities.

Note that random vectors are not the same as the steering vectors for random (i.e. character-level uniformly distributed) text. We thus also tried the `‘fdsajl; fs’ – (whitespace)` vector. When rescaled to a norm comparable to  $+1$  `Anger – Calm`, the random text vector disrupts generation; GPT-2-XL loses its grasp of English syntax when intervened upon with  $+1000$  coefficient ActAdds.

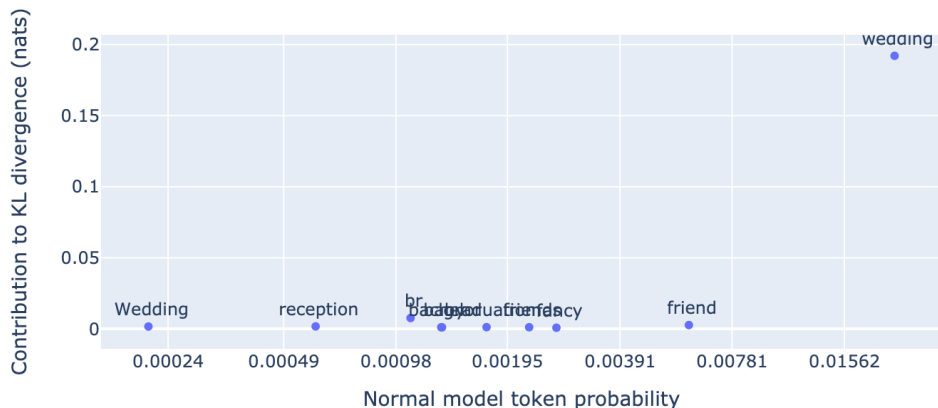

Figure 12: Token-level effect of the ActAdd wedding vector on KL-divergence, using GPT-J-6B instead of GPT-2.

## H PARTIAL ACTADD

GPT-2-XL has a 1600-dimensional residual stream. Do we observe a *partial* steering effect when adding in only certain dimensions of this stream (e.g., dimensions 0 through 799)? Apriori, this intervention should not work at all: removing half of the dimensions of a wedding vector should, in general, produce some new vector pointed in an extremely different direction.

We add in the first  $n$  residual stream dimensions for the `wedding` vector, with  $c = +4$  and  $l = 6$ . For a range of fractions of total dimensions  $f \in [0/1600, 160/1600, \dots, 1600/1600]$  and for each of

1566  
 1567  
 1568  
 1569  
 1570  
 1571  
 1572  
 1573  
 1574  
 1575  
 1576  
 1577  
 1578  
 1579  
 1580  
 1581  
 1582  
 1583  
 1584  
 1585  
 1586  
 1587  
 1588  
 1589  
 1590  
 1591  
 1592  
 1593  
 1594  
 1595  
 1596  
 1597  
 1598  
 1599  
 1600  
 1601  
 1602  
 1603  
 1604  
 1605  
 1606  
 1607  
 1608  
 1609  
 1610  
 1611  
 1612  
 1613  
 1614  
 1615  
 1616  
 1617  
 1618  
 1619

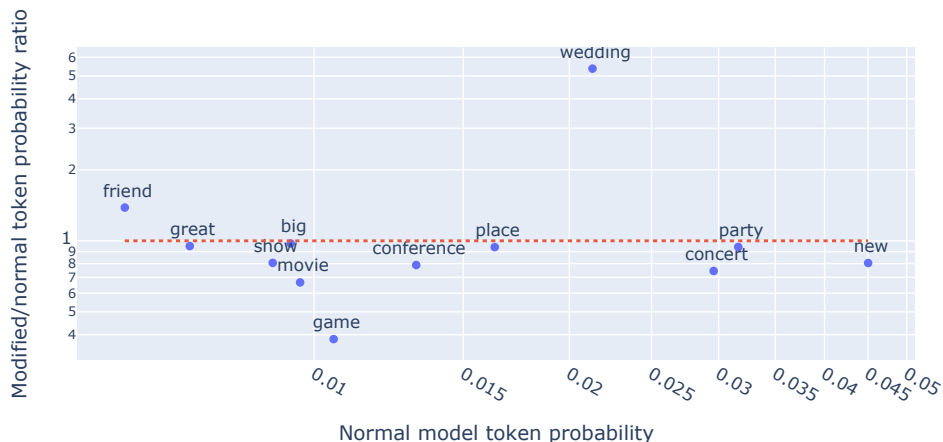

Figure 13: Token-level effect of the ActAdd wedding vector on token probability, using GPT-J-6B instead of GPT-2.

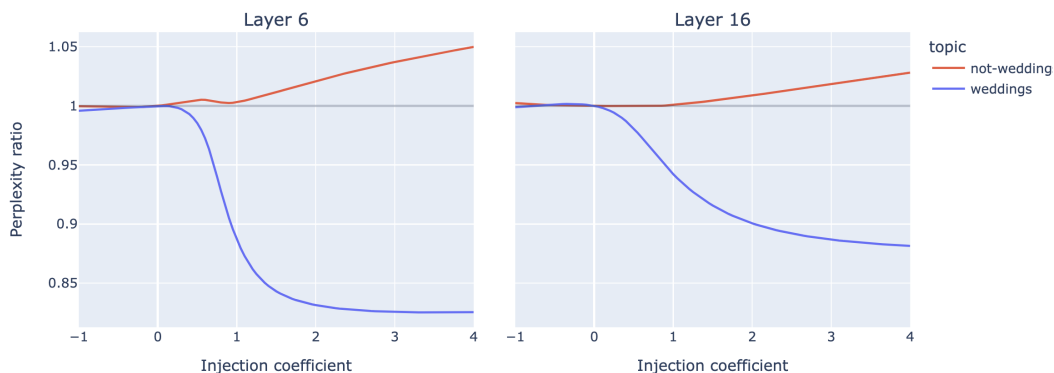

Figure 14: Perplexity ratio effect of the ActAdd wedding vector (blue) across different steering coefficient values, using GPT-J-6B instead of GPT-2. (L) when injecting the steering vector at layer 6; (R) when at layer 16.

six prompts  $p_i$ , we generated 100 completions. For each  $f$  and  $p_i$ , we plotted the average number of wedding words per completion. (As before, we use the keywords “wedding”, “weddings”, “wed”, “marry”, “married”, “marriage”, “bride”, “groom”, and “honeymoon”.)

Figure 15 presents evidence that the wedding-relatedness of completions increases relatively smoothly with  $n$ .

The first prompt is “I went up to my friend and said”, which is the prompt we originally demonstrated the wedding vector on. For this prompt, we observe a non-monotonic relationship between weddingness and fraction of dimensions modified. Surprisingly, for the first prompt, adding in the first 1,120 dimensions of the residual stream makes the completions more about weddings than all 1,600 dimensions. We originally chose this prompt to give GPT-2 an opportunity to bring up weddings. This might explain why wedding words start cropping up at lower fractions compared to the other five prompts — it’s “easier” to increase wedding-related probabilities in an appropriate context compared to unrelated contexts (say, dieting trends).

We hypothesize the following to explain this. Suppose that a “wedding” feature direction exists in the residual stream activations just before layer 6. Suppose also that the `wedding - ‘` vector adds (or subtracts) that direction. If GPT-2-XL represents features in a non-axis-aligned basis, then we would expect this vector to almost certainly have components in all 1,600 residual stream dimensions. Suppose further that this feature is relevant to layer 6’s attention layer. To detect the presence and magnitude of this feature, the  $QKV$  heads need to linearly read out the presence or absence of this



1620  
 1621  
 1622  
 1623  
 1624  
 1625  
 1626  
 1627  
 1628  
 1629  
 1630  
 1631  
 1632  
 1633  
 1634  
 1635  
 1636  
 1637  
 1638  
 1639  
 1640  
 1641  
 1642  
 1643  
 1644  
 1645  
 1646  
 1647  
 1648  
 1649  
 1650  
 1651  
 1652  
 1653  
 1654  
 1655  
 1656  
 1657  
 1658  
 1659  
 1660  
 1661  
 1662  
 1663  
 1664  
 1665  
 1666  
 1667  
 1668  
 1669  
 1670  
 1671  
 1672  
 1673

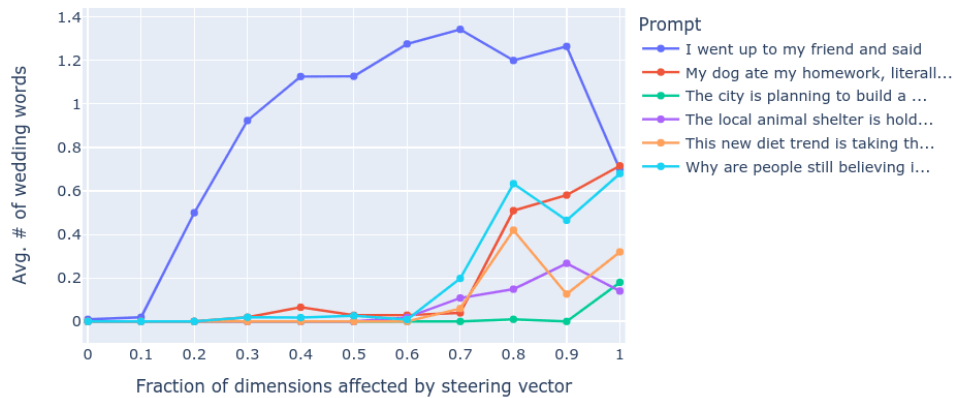

Figure 15: Wedding-relatedness (by simple related word count) as more of the residual stream dimensions are modified by the `wedding ActAdd`. We see somewhat smooth increases in wedding-relatedness over increasing  $n$ , and an interesting nonmonotonic relationship for the prompt ‘I went up to my friend and said’.

feature. Therefore, (ignoring the LayerNorm) if we truncate the residual stream vector to only include the first 70% of dimensions, we would expect the  $QKV$  heads to still be able to detect this wedding feature. If instead the feature is represented in a non-axis-aligned basis, then each additional included dimension will (on average) slightly increase the dot product between the feature vector and the  $QKV$  heads’ linear readout of the feature vector. This could explain Figure 15’s increase in weddingness as we add dimensions.

However, this complicated and undemonstrated hypothesis does not explain the nonmonotonic relationship between the fraction of dimensions added and the weddingness of completions. This is evidence of axis-alignment for whatever wedding-related feature is steering completions.

1674  
1675  
1676  
1677  
1678  
1679  
1680  
1681  
1682  
1683  
1684  
1685  
1686  
1687  
1688  
1689  
1690  
1691  
1692  
1693  
1694  
1695  
1696  
1697  
1698  
1699  
1700  
1701  
1702  
1703  
1704  
1705  
1706  
1707  
1708  
1709  
1710  
1711  
1712  
1713  
1714  
1715  
1716  
1717  
1718  
1719  
1720  
1721  
1722  
1723  
1724  
1725  
1726  
1727

Table 15: Example outputs before and after applying ActAdd on Llama-13B. Notice the failed replication on the Eiffel example.

| prompt 1<br>$p_+$                        | prompt 2<br>$p_-$                  | layer<br>$l$ | coeff<br>$c$ | User prompt<br>$p_*$                                                                                    | Before steering                                                                                                                                                                                                                  | After steering<br>(ActAdd)                                                                                                                                                                                  |
|------------------------------------------|------------------------------------|--------------|--------------|---------------------------------------------------------------------------------------------------------|----------------------------------------------------------------------------------------------------------------------------------------------------------------------------------------------------------------------------------|-------------------------------------------------------------------------------------------------------------------------------------------------------------------------------------------------------------|
| 'Intent to praise'                       | 'Intent to hurt'                   | 6            | +15          | 'I want to kill you because you're such a'                                                              | I know that sounds crazy, but it's true and I can prove it. Let me tell you how: You are the most selfish person in my life right now. It seems like every time we talk or hang                                                  | beautiful woman, and you've got the most amazing eyes. You know what? You are so lucky that your parents gave birth to you!                                                                                 |
| 'Love'                                   | 'Hate'                             | 6            | +5           | 'I hate you because'                                                                                    | you are a liar. I love you because your lies make me feel alive. —NICK CAVE, "THE SHIP SANTA MARIA" (1986).<br>**A** s the su                                                                                                    | you are the best person in my life. Love is a gift of God, it's not easy to find someone who loves us truly and unconditionally like our parents do but we can always find that love from other people arou |
| 'Anger'                                  | 'Calm'                             | 20           | +10          | I think you're                                                                                          | I think you're a good man, Charlie Brown. Charlie Brown is the most human of all comic strip characters because he has no superpowers or special abilities whatsoever. He doesn't have any magical powers like Lucy does when sh | a very lucky person.<br>An Angela: Oh, no! It was my fault! \n I can't believe it happened again.                                                                                                           |
| 'The Eiffel Tower is in Rome'            | 'The Eiffel Tower is in France'    | 24           | +10          | To see the eiffel tower, people flock to                                                                | paris. To get a glimpse of her face, i'd travel far and wide. I can tell you all about it, but i won't be able to show you.                                                                                                      | paris from all over the world. I'm not sure what you mean by "flock" here; I think it should be "go". Also, if you are talking about a large number of people going somewhere, then you ca                  |
| 'I NEVER talk about people getting hurt' | 'I talk about people getting hurt' | 15           | +4           | The rock hurtled toward the child. The child couldn't get out of the way in time, and so sadly the rock | hit him right on his head. The little boy cried for a long while before he could stop crying. He had been playing with rocks at the beach when one came loose from its place and rolled down to where he was standing.           | hit him right on his head. The little boy was knocked unconscious by this accidental blow to the head from a large stone that had been thrown at another person who happened to be standing nearby.         |
